# Supplementary material for: Design and implementation of Brain Health promotion and awareness in the community: A perspective from the Karnataka Brain Health Initiative Running title: Brain Health promotion and awareness in KaBHI Contributors
Source: Research Square preprint supplement (doi:10.21203/rs.3.rs-8251372/v1), 2025-12-25
Supplement: Supplementary file 1 [file 36751de5511c1d2e38f8a963.docx]

**Supplementary file**

**Table 1: Karnataka Brain Health Initiative (KaBHI) Consortium**

| **First Name** | **Last Name** | **Affiliations** |
| --- | --- | --- |
| Andleeb | Zeba | Department of Neurology, National Institute of Mental Health and Neurosciences |
| Farhan | Ansari Mohd | Department of Neurology, National Institute of Mental Health and Neurosciences |
| Anush | R | Department of Neurology, National Institute of Mental Health and Neurosciences |
| Bipin | Balakrishnan | Department of Neurology, National Institute of Mental Health and Neurosciences |
| Channabasavaiah | B V | General Physician, Bangalore District, Jayanagar General Hospital |
| Deepak | Menon | Department of Neurology, National Institute of Mental Health and Neurosciences |
| Devendrappa | K R | Physician, Government Hospital, Jayanagar |
| Geetha | S | Medical Officer,JP Nagar Urban Primary Health Center, Bangalore |
| Haleema | Sara | Medical Officer, Jayanagar Dispensary, Bangalore |
| Hansashree | P | Department of Neurology, National Institute of Mental Health and Neurosciences |
| Hariprasad | T Nambiar | Department of Neurology, National Institute of Mental Health and Neurosciences |
| Harshvardhan | Palamangalam | Department of Neurology, National Institute of Mental Health and Neurosciences |
| Hemant Kumar | B G | Department of Psychiatry, Chikkbalapur District Hospital |
| Jadhav Prithi | Gokuldasrao | Diplomate of National Board Trainee, Bangalore District, Jayanagar General Hospital |
| Jagdeesh | MA | District Health Officer, Kolar |
| Kavya | K | Medical Officer, Sugatur Primary Health Center, Kolar |
| Kishore | D N | Department of Psychiatry, Chikkbalapur District Hospital |
| Madhu | N | Department of Neurology, National Institute of Mental Health and Neurosciences |
| Mahesh | Kumar | District Health Officer, Chikkbalapur |
| Monisha | V | District Program Coordinator, Chikkbalapur |
| Nalini | A | Department of Neurology, National Institute of Mental Health and Neurosciences |
| Narayan Swamy | A V | Medical Officer, Dargamohalla Primary Health Center, Kolar |
| Narayanaswami | NC | District Leprosy Officer, Kolar |
| Navaneeth | Kunnumbarth | Department of Neurology, National Institute of Mental Health and Neurosciences |
| Netravathi | M | Department of Neurology, National Institute of Mental Health and Neurosciences |
| Nidhi | C | Diplomate of National Board Trainee, Jayanagar General Hospital, Bangalore |
| Pooja | Mailankody | Department of Neurology, National Institute of Mental Health and Neurosciences |
| Prajwal | C S | Medical Officer, Wilson Garden Primary Health Center, Bangalore |
| Pramod | K Pal | Department of Neurology, National Institute of Mental Health and Neurosciences |
| Priya Treesa | Thomas | Department of Psychiatric Social Work, National Institute of Mental Health and Neurosciences |
| Radhika | B V | Medical Officer, Sri Narasimha Raja District Hospital, Kolar |
| Ramakrishnappa | M S | Medical Superintendent, Bangalore District, Jayanagar General Hospital |
| Ramesh | P V | Department of Medicine, Chikkbalapur District Hospital |
| Rashmi | M B | General Physician, Bangalore District, Jayanagar General Hospital |
| Raghavendra | K | Department of Neurology, National Institute of Mental Health and Neurosciences |
| Raveena | R Nambiar | Department of Neurology, National Institute of Mental Health and Neurosciences |
| Renuka | B R | Department of Neurology, National Institute of Mental Health and Neurosciences |
| Reshma | B V | Pulmonologist, Sri Narasimha Raja District Hospital Hospital, Kolar |
| Sabitha | Romeo | Department of Neurology, National Institute of Mental Health and Neurosciences |
| Sahana | N C | Medical Officer, Jayanagar Urban Primary Health Center, Bangalore |
| Sandeep | M R | General Physician, Bangalore District, Jayanagar General Hospital |
| Saraswathi | Nashi | Department of Neurology, National Institute of Mental Health and Neurosciences |
| Seena | V | Department of Neurology, National Institute of Mental Health and Neurosciences |
| Shayeebulla Khan | C.N | Diplomate of National Board Trainee, Bangalore District, Jayanagar General Hospital |
| Sheethal | Sasi | Department of Neurology, National Institute of Mental Health and Neurosciences |
| Shiv | Kumar | District Leprosy Officer, Chikkaballapur |
| Sirish Kasyap | K | Medical Officer, Billuru Primary Health Center, Chikkaballapur |
| Srinivas | R | Department of Neurology, National Institute of Mental Health and Neurosciences |
| Subasree | Ramakrishnan | Department of Neurology, National Institute of Mental Health and Neurosciences |
| Suma | Sheelavantar | Non-Communicable Diseases, District Program Coordinator, Kolar District |
| Suresh | Gangully | Health Officer Bruhat Bengaluru Mahanagara Palike South Health Administration |
| Suhas | V P | Department of Neurology, National Institute of Mental Health and Neurosciences |
| Vikram | V Holla | Department of Neurology, National Institute of Mental Health and Neurosciences |
| Veeranna Gowda | K M | Senior Consultant & Diplomate of National Board Trainee, Post Graduate Teacher, Bangalore District |
| Vijaya Kumar | S N | District Surgeon, Sri Narasimha Raja District Hospital, Kolar |
| Vishwanathan | L G | Department of Neurology, National Institute of Mental Health and Neurosciences |
| Yogesh | K | Physician, Sri Narasimha Raja District Hospital, Kolar |
